# Supplementary material for: Antibiotic Use Among University Students in Malaria Therapy and Its Implications for Antimicrobial Resistance in Nigeria: A Quantitative Cross-sectional Study
Source: Research Square preprint supplement (doi:10.21203/rs.3.rs-7439669/v1), 2025-09-10
Supplement: Supplementary file 2 [file 88647d5b8764545c0811c4d8.pdf]

# Chi-Square Test Results for Awareness of Antimicrobial Resistance (AMR) by Demographic

| Variable          | X <sup>2</sup> | df | N   | p-value |
|-------------------|----------------|----|-----|---------|
| Gender            | 0.077          | 1  | 646 | 0.781   |
| Age Group         | 2.072          | 2  | 646 | 0.355   |
| Geopolitical Zone | 5.822          | 5  | 646 | 0.324   |

No statistically significant association were found at the  $p < .05$  level.

The results indicated no statistically significant association between AMR awareness and gender,  $X^2(1, N = 646) = 0.077$ ,  $p = .781$ ; age group,  $X^2(2, N = 646) = 2.072$ ,  $p = .355$ ; or geopolitical zone,  $X^2(5, N = 646) = 5.822$ ,  $p = .324$ . These findings suggest that awareness of AMR is relatively consistent across various socio-demographic categories in the sampled population.

| Predictor                   | B      | SE    | Wald X <sup>2</sup> | p-value | Exp(B) |
|-----------------------------|--------|-------|---------------------|---------|--------|
| Gender                      |        |       |                     |         |        |
| Male vs Female              | -0.072 | 0.233 | 0.095               | 0.758   | 0.931  |
|                             |        |       |                     |         | -      |
| Age Group                   |        |       | 1.790               | 0.409   |        |
| 18 – 24 vs 31+              | 1.371  | 1.039 | 1.742               | 0.187   | 3.939  |
| 25-30 vs 31+                | -0.026 | 0.265 | 0.010               | 0.922   | 0.974  |
| Geopolitical Zone           |        |       | 5.898               | 0.316   | -      |
| North West vs South East    | -0.168 | 0.376 | 0.200               | 0.655   | 0.845  |
| North East vs South East    | 0.408  | 0.423 | 0.932               | 0.334   | 1.504  |
| North Central vs South East | 0.296  | 0.334 | 0.790               | 0.374   | 1.345  |
| South West vs South East    | -0.306 | 0.343 | 0.796               | 0.372   | 0.736  |
| South South vs South East   | -0.343 | 0.380 | 0.815               | 0.367   | 0.710  |
| Constant                    | 1.725  | 0.283 | 37.113              | <.001   | 5.614  |

Table 2 presents the results of a binary logistic regression predicting awareness of antimicrobial resistance (AMR) based on gender, age group, and geopolitical zone. None of the predictors were statistically significant at the  $p > 0.05$  level. Males were slightly less likely to report awareness than females ( $p = 0.758$ ), and although respondent aged 18 – 24 had a higher odd of awareness ( $\text{Exp}(B) = 3.939$ ), this was not significantly ( $p = 0.187$ ). Differences across geopolitical zones were also not statistically significant.

Table 3: Spearman's Correlation Between Potential Factors and the Use of Antibiotics in Malaria

| <b>Variables</b>                                                                                                 | <b>q(Spearman)</b> | <b>p-value</b> | <b>Strength &amp; Direction</b>                  |
|------------------------------------------------------------------------------------------------------------------|--------------------|----------------|--------------------------------------------------|
| Do you believe antibiotics are always needed when you are sick?                                                  | 0.329              | 0.001          | Moderate positive<br>(Statistically significant) |
| Do you think it's okay to stop taking antibiotics once you feel better, even if you haven't finished the course? | 0.087              | 0.026          | Weak positive<br>(Statistically significant)     |
| Do you complete the full course of antibiotics prescribe to you?                                                 | 0.026              | 0.509          | Very positive<br>(Statistically significant)     |
| Are you aware of antimicrobial resistance and its consequences?                                                  | -0.041             | 0.299          | Very weak negative<br>(not significant)          |
| Do you think the misuse of antibiotics can contribute to AMR?                                                    | -0.008             | 0.844          | Negligible negative<br>(not significant)         |

This table presents the Spearman correlation results between selected behavioral and knowledge-based variables and the use of antibiotics in malaria therapy. A moderate, statistically significant positive correlation was found with the belief that antibiotics are always needed when one is sick ( $q = 0.329$ ,  $p < 0.001$ ). A weak but significant positive relationship was also observed for the belief that it's okay to stop antibiotics once feeling better ( $q = 0.087$ ,  $p = 0.026$ ). Other variables, such as completing the full course of antibiotics, awareness of AMR, and belief that misuse contribute to AMR, showed no statistically significant association
